# Supplementary material
Source: PubMed Central journal article supplement (PMC4330189)
Supplement: NIHMS340239-supplement-1.pdf [file NIHMS340239-supplement-1.pdf]

**Supplementary Table 1 (online only).** Associations of *MC1R* genotypes with self-reported phenotypic characteristics for controls combined<sup>a</sup>

| Phenotypic characteristic           | Comparison                                   | <i>MC1R</i> categories <sup>b</sup>             |               |                                               |                          |                                         |                          |
|-------------------------------------|----------------------------------------------|-------------------------------------------------|---------------|-----------------------------------------------|--------------------------|-----------------------------------------|--------------------------|
|                                     |                                              | No variant (wildtype only; 0 r and 0 R alleles) |               | Any r in absence of R (≥ 1 r and 0 R alleles) |                          | Any R (1 or more R alleles)             |                          |
|                                     |                                              | No. with vs without high-risk phenotype         | OR (referent) | No. with vs without high-risk phenotype       | OR (95% CI) <sup>c</sup> | No. with vs without high-risk phenotype | OR (95% CI) <sup>c</sup> |
| Hair colour                         | red hair <i>cf.</i> blonde/brown/black       | 1 / 209                                         | 1.0           | 3 / 274                                       | 2.3 (0.2-22.0)           | 67 / 372                                | 34.3 (4.7-250.3)         |
| Skin colour                         | very fair/fair skin <i>cf.</i> olive or dark | 155 / 55                                        | 1.0           | 224 / 52                                      | 1.5 (1.0-2.4)            | 407 / 31                                | 3.9 (2.4-6.4)            |
| Ability to tan <sup>d</sup>         | never/sometimes <i>cf.</i> usually/always    | 58 / 152                                        | 1.0           | 97 / 179                                      | 1.4 (1.0-2.1)            | 269 / 169                               | 3.9 (2.7-5.6)            |
| Freckling in childhood <sup>e</sup> | few/some/many <i>cf.</i> none/very few       | 51 / 159                                        | 1.0           | 89 / 186                                      | 1.5 (1.0-2.2)            | 268 / 170                               | 4.7 (3.2-6.9)            |
| Solar lentigines <sup>f</sup>       | 60-100 <i>cf.</i> 0-40                       | 27 / 82                                         | 1.0           | 58 / 91                                       | 1.8 (1.0-3.2)            | 114 / 103                               | 2.9 (1.7-5.0)            |

<sup>a</sup> Controls include unrelated controls (population controls and spouse/friend controls) and sibling controls. Cases are not included in this table.

<sup>b</sup> The *MC1R* categories are mutually exclusive. Silent changes (i.e. changes that are synonymous or occur in non-coding regions) are counted as consensus alleles.

<sup>c</sup> Unconditional logistic regression, adjusted for age, sex, city of recruitment, European ancestry and control type.

<sup>d</sup> Usual skin response to sun exposure: Never or sometimes tans, usually or always burns *cf.* Usually or always tans, never or sometimes burns.

<sup>e</sup> Based on a 6-level picture scale of the face.

<sup>f</sup> Objective measure based on a 6-level picture scale (0,20,40,60,80,100) of the top of the back and shoulders, with 0 representing no solar lentigines and 100 representing 'very many'. Data for this variable were only available for those who had a clinical skin examination.

**Supplementary Table 2 (online only).** Mutually-adjusted per R allele and per r allele associations with melanoma, by demographic factors, phenotype, sun exposure and melanoma characteristics

| Stratification variable                 | Case-unrelated-control <sup>a</sup> comparison |                                                       |                                                       | Case-sibling-control comparison |                                                       |                                                       |
|-----------------------------------------|------------------------------------------------|-------------------------------------------------------|-------------------------------------------------------|---------------------------------|-------------------------------------------------------|-------------------------------------------------------|
|                                         | Cases / controls                               | per r allele <sup>b</sup><br>OR <sup>c</sup> (95% CI) | per R allele <sup>b</sup><br>OR <sup>c</sup> (95% CI) | Cases / controls                | per r allele <sup>b</sup><br>OR <sup>d</sup> (95% CI) | per R allele <sup>b</sup><br>OR <sup>d</sup> (95% CI) |
| None                                    | 565/409                                        | 1.69 (1.33-2.13)                                      | 2.23 (1.77-2.80)                                      | 328/518                         | 1.25 (0.88-1.79)                                      | 2.06 (1.47-2.88)                                      |
| Sex                                     |                                                |                                                       |                                                       |                                 |                                                       |                                                       |
| Female                                  | 357/241                                        | 1.23 (0.92-1.64)                                      | 1.99 (1.49-2.66)                                      | 145/203                         | 1.17 (0.66-2.06)                                      | 1.91 (1.14-3.20)                                      |
| Male                                    | 208/168                                        | 3.05 (1.98-4.70)                                      | 2.79 (1.88-4.15)                                      | 63/78                           | 2.52 (1.05-6.07)                                      | 5.68 (2.04-15.78)                                     |
| <i>p</i> interaction                    |                                                | 0.001                                                 | 1.0                                                   |                                 | 0.5                                                   | 0.1                                                   |
| Age                                     |                                                |                                                       |                                                       |                                 |                                                       |                                                       |
| 18-29                                   | 173/79                                         | 2.07 (1.24-3.46)                                      | 2.86 (1.72-4.73)                                      | 69/80                           | 1.28 (0.59-2.79)                                      | 0.97 (0.43-2.18)                                      |
| 30-44                                   | 392/330                                        | 1.60 (1.22-2.10)                                      | 2.16 (1.65-2.81)                                      | 218/334                         | 1.35 (0.85-2.14)                                      | 2.61 (1.63-4.21)                                      |
| <i>p</i> interaction                    |                                                | 0.7                                                   | 0.8                                                   |                                 | 0.4                                                   | 0.03                                                  |
| Family history of melanoma <sup>e</sup> |                                                |                                                       |                                                       |                                 |                                                       |                                                       |
| No                                      | 509/388                                        | 1.76 (1.38-2.26)                                      | 2.17 (1.71-2.76)                                      |                                 |                                                       |                                                       |
| Yes                                     | 56/21                                          | 0.68 (0.26-1.74)                                      | 2.29 (0.88-5.96)                                      |                                 |                                                       |                                                       |
| <i>p</i> interaction                    |                                                | 0.07                                                  | 0.5                                                   |                                 |                                                       |                                                       |
| Pigmentation score <sup>f</sup>         |                                                |                                                       |                                                       |                                 |                                                       |                                                       |
| ≤ Median                                | 235/248                                        | 1.66 (1.20-2.30)                                      | 1.72 (1.17-2.54)                                      | 97/202                          | 1.25 (0.61-2.56)                                      | 2.61 (1.41-4.86)                                      |
| >Median                                 | 330/161                                        | 1.56 (1.10-2.22)                                      | 2.13 (1.55-2.93)                                      | 151/152                         | 1.17 (0.62-2.23)                                      | 2.01 (1.10-3.69)                                      |
| <i>p</i> interaction                    |                                                | 0.6                                                   | 0.4                                                   |                                 | 1.0                                                   | 0.5                                                   |
| Hair colour                             |                                                |                                                       |                                                       |                                 |                                                       |                                                       |
| Brown/Black                             | 371/338                                        | 1.68 (1.29-2.18)                                      | 1.85 (1.35-2.52)                                      | 194/271                         | 1.54 (0.98-2.44)                                      | 2.53 (1.50-4.25)                                      |
| Red/Blonde/Fair                         | 192/71                                         | 1.47 (0.84-2.58)                                      | 2.11 (1.33-3.34)                                      | 64/78                           | 0.75 (0.25-2.25)                                      | 1.72 (0.59-5.03)                                      |
| <i>p</i> interaction                    |                                                | 0.5                                                   | 0.6                                                   |                                 | 0.3                                                   | 0.9                                                   |
| Skin colour                             |                                                |                                                       |                                                       |                                 |                                                       |                                                       |
| Olive/Brown                             | 55/68                                          | 1.84 (0.95-3.57)                                      | 2.17 (0.95-4.98)                                      | 18/21                           | 0.52 (0.08-3.27)                                      | 6.28 (0.38-102.96)                                    |
| Very fair/Fair                          | 507/340                                        | 1.64 (1.27-2.12)                                      | 2.20 (1.72-2.82)                                      | 268/419                         | 1.30 (0.86-1.95)                                      | 1.97 (1.35-2.86)                                      |
| <i>p</i> interaction                    |                                                | 0.8                                                   | 0.8                                                   |                                 | 0.2                                                   | 0.4                                                   |
| Eye colour                              |                                                |                                                       |                                                       |                                 |                                                       |                                                       |
| Hazel/Brown/Black                       | 307/228                                        | 1.86 (1.35-2.58)                                      | 2.08 (1.54-2.81)                                      | 140/199                         | 1.18 (0.67-2.06)                                      | 2.25 (1.29-3.94)                                      |
| Blue/Grey/Green                         | 256/177                                        | 1.56 (1.08-2.24)                                      | 2.39 (1.65-3.46)                                      | 108/172                         | 1.53 (0.82-2.85)                                      | 1.69 (0.97-2.97)                                      |
| <i>p</i> interaction                    |                                                | 0.3                                                   | 0.4                                                   |                                 | 0.4                                                   | 0.3                                                   |
| Ability to tan <sup>g</sup>             |                                                |                                                       |                                                       |                                 |                                                       |                                                       |
| Usually/Always                          | 259/238                                        | 1.53 (1.12-2.10)                                      | 2.03 (1.41-2.92)                                      | 103/131                         | 1.65 (0.86-3.13)                                      | 2.68 (1.26-5.74)                                      |
| Sometimes/Never                         | 304/168                                        | 2.06 (1.40-3.03)                                      | 2.55 (1.81-3.58)                                      | 119/175                         | 1.31 (0.69-2.51)                                      | 2.45 (1.25-4.80)                                      |
| <i>p</i> interaction                    |                                                | 0.4                                                   | 0.8                                                   |                                 | 0.5                                                   | 1.0                                                   |
| Propensity to sunburn <sup>h</sup>      |                                                |                                                       |                                                       |                                 |                                                       |                                                       |
| Mild/No burn                            | 196/196                                        | 1.66 (1.16-2.39)                                      | 1.93 (1.30-2.87)                                      | 72/87                           | 0.83 (0.37-1.86)                                      | 1.45 (0.62-3.39)                                      |
| Severe/Painful burn                     | 368/212                                        | 1.62 (1.17-2.23)                                      | 2.28 (1.68-3.09)                                      | 151/223                         | 1.67 (0.97-2.88)                                      | 2.40 (1.38-4.18)                                      |
| <i>p</i> interaction                    |                                                | 0.7                                                   | 0.5                                                   |                                 | 0.3                                                   | 0.7                                                   |
| Childhood Freckling <sup>i</sup>        |                                                |                                                       |                                                       |                                 |                                                       |                                                       |
| None/Very few                           | 267/240                                        | 1.90 (1.37-2.66)                                      | 2.41 (1.63-3.55)                                      | 117/152                         | 1.37 (0.75-2.49)                                      | 2.49 (1.19-5.22)                                      |
| Few/Some/Many                           | 295/168                                        | 1.46 (1.02-2.09)                                      | 2.04 (1.47-2.84)                                      | 111/160                         | 0.93 (0.48-1.81)                                      | 1.40 (0.75-2.62)                                      |
| <i>p</i> interaction                    |                                                | 0.5                                                   | 0.8                                                   |                                 | 0.6                                                   | 0.4                                                   |
| Number of nevi <sup>j</sup>             |                                                |                                                       |                                                       |                                 |                                                       |                                                       |
| None/Few                                | 172/234                                        | 2.84 (1.87-4.33)                                      | 3.20 (2.23-4.59)                                      | 78/111                          | 1.40 (0.64-3.06)                                      | 2.61 (1.10-6.18)                                      |
| Some/Many                               | 391/173                                        | 1.21 (0.89-1.65)                                      | 2.04 (1.45-2.87)                                      | 148/192                         | 1.07 (0.62-1.85)                                      | 1.60 (0.96-2.66)                                      |
| <i>p</i> interaction                    |                                                | 0.007                                                 | 0.4                                                   |                                 | 0.8                                                   | 0.5                                                   |
| Childhood total sun exposure            |                                                |                                                       |                                                       |                                 |                                                       |                                                       |
| ≤ Median                                | 286/205                                        | 1.23 (0.89-1.71)                                      | 1.83 (1.34-2.49)                                      | 121/157                         | 1.11 (0.64-1.93)                                      | 1.48 (0.84-2.58)                                      |
| > Median                                | 279/204                                        | 2.31 (1.62-3.29)                                      | 2.92 (2.05-4.17)                                      | 94/127                          | 1.28 (0.64-2.55)                                      | 2.64 (1.38-5.05)                                      |
| <i>p</i> interaction                    |                                                | 0.07                                                  | 0.2                                                   |                                 | 0.8                                                   | 0.2                                                   |
| Childhood sunburn causing blisters      |                                                |                                                       |                                                       |                                 |                                                       |                                                       |

|                                              |         |                  |                  |         |                   |                    |
|----------------------------------------------|---------|------------------|------------------|---------|-------------------|--------------------|
| None                                         | 366/283 | 1.50 (1.14-1.99) | 2.02 (1.52-2.68) | 173/248 | 1.04 (0.64-1.69)  | 2.46 (1.52-3.98)   |
| Any                                          | 196/126 | 2.16 (1.39-3.37) | 2.71 (1.80-4.09) | 57/69   | 1.76 (0.56-5.55)  | 5.74 (1.35-24.43)  |
| <i>p</i> interaction                         |         | 0.4              | 0.4              |         | 0.7               | 0.6                |
| Childhood ambient UV irradiance <sup>k</sup> |         |                  |                  |         |                   |                    |
| ≤ Median                                     | 330/207 | 1.86 (1.33-2.60) | 2.32 (1.66-3.23) | 158/248 | 1.28 (0.79-2.07)  | 1.99 (1.21-3.27)   |
| > Median                                     | 234/202 | 1.57 (1.12-2.21) | 2.18 (1.57-3.02) | 163/249 | 1.20 (0.70-2.05)  | 2.24 (1.36-3.68)   |
| <i>p</i> interaction                         |         | 0.5              | 0.9              |         | 0.8               | 0.6                |
| Sunbed use                                   |         |                  |                  |         |                   |                    |
| None                                         | 432/339 | 1.81 (1.38-2.38) | 2.36 (1.82-3.05) | 228/341 | 1.23 (0.80-1.89)  | 1.75 (1.18-2.59)   |
| Any                                          | 130/68  | 1.34 (0.81-2.23) | 1.73 (1.02-2.93) | 27/35   | 1.43 (0.45-4.47)  | 3.51 (0.69-17.97)  |
| <i>p</i> interaction                         |         | 0.4              | 0.3              |         | 0.9               | 0.5                |
| Body site of melanoma                        |         |                  |                  |         |                   |                    |
| Head or neck                                 | 74/409  | 1.51 (0.96-2.38) | 2.16 (1.43-3.27) | 40/65   | 1.13 (0.37-3.42)  | 2.21 (0.62-7.90)   |
| Trunk                                        | 190/409 | 1.54 (1.13-2.09) | 1.96 (1.46-2.64) | 114/185 | 1.14 (0.66-1.95)  | 1.89 (1.02-3.50)   |
| Arms                                         | 121/409 | 1.78 (1.25-2.54) | 2.08 (1.47-2.93) | 68/104  | 0.56 (0.18-1.71)  | 2.45 (1.07-5.61)   |
| Legs                                         | 168/409 | 1.87 (1.34-2.61) | 2.93 (2.14-4.01) | 100/153 | 2.31 (1.09-4.88)  | 2.83 (1.50-5.33)   |
| <i>p</i> interaction                         |         | 0.5              | 0.1              |         | 0.3               | 0.8                |
| Breslow thickness                            |         |                  |                  |         |                   |                    |
| ≤ 0.75 mm                                    | 367/409 | 1.65 (1.28-2.12) | 1.97 (1.54-2.53) | 222/342 | 1.17 (0.76-1.82)  | 2.03 (1.35-3.07)   |
| > 0.75 mm                                    | 195/409 | 1.76 (1.29-2.42) | 2.77 (2.06-3.73) | 104/173 | 1.40 (0.76-2.59)  | 2.02 (1.11-3.68)   |
| <i>p</i> interaction                         |         | 0.7              | 0.02             |         | 0.6               | 0.9                |
| Histological subtype <sup>l</sup>            |         |                  |                  |         |                   |                    |
| Superficial spreading                        | 326/409 | 1.62 (1.24-2.12) | 2.31 (1.79-2.98) | 13/21   | 3.65 (0.42-31.37) | 2.24 (0.33-15.21)  |
| Nodular                                      | 25/409  | 3.80 (1.86-7.74) | 3.69 (1.78-7.68) | 108/156 | 1.22 (0.65-2.30)  | 1.46 (0.77-2.77)   |
| Other                                        | 16/409  | 0.89 (0.37-2.15) | 1.07 (0.46-2.48) | 8/15    | 0.94 (0.02-56.81) | 2.25 (0.03-178.12) |
| Not otherwise specified                      | 198/409 | 1.73 (1.27-2.35) | 2.13 (1.58-2.86) | 199/326 | 1.18 (0.74-1.88)  | 2.35 (1.53-3.61)   |
| <i>p</i> interaction                         |         | 0.04             | 0.1              |         | 0.5               | 0.6                |

<sup>a</sup> Unrelated controls include population controls and spouse/friend controls

<sup>b</sup> ORs were calculated as the risk associated with each additional variant allele carried. The models were mutually adjusted in order to estimate their independent effects. R variants include D84E, R142H, R151C, I155T, R160W, D294H. r variants exclude silent changes (i.e. changes that are synonymous or occur in non-coding regions).

<sup>c</sup> Unconditional logistic regression, adjusted for age, sex, city of recruitment, and European ancestry.

<sup>d</sup> Conditional logistic regression, matched on family and adjusted for age and sex.

<sup>e</sup> Confirmed family history of melanoma in 1<sup>st</sup> degree relatives

<sup>f</sup> A continuous variable summarizing the contribution of several correlated, categorical phenotypic variables. A higher score indicates a more sun-sensitive phenotype

<sup>g</sup> Usual skin response to sun exposure: Never or sometimes tans, usually or always burns *cf.* Usually or always tans, never or sometimes burns

<sup>h</sup> Skin response to exposure to bright sunlight for the first time in summer without protection

<sup>i</sup> Based on a 6-level picture scale of the face

<sup>j</sup> Number of nevi covering the body based on a 4-level picture scale

<sup>k</sup> Erythemally weighted ambient UV irradiance (kJ/m<sup>2</sup>) derived from residence history and data from satellite observations

<sup>l</sup> 'Other' histological subtypes include malignant melanoma, regressing; lentigo maligna melanoma; acral lentiginous melanoma; and desmoplastic melanoma.
